# Supplementary material
Source: PubMed Central journal article supplement (PMC2765162)
Supplement: 0909267106_0909267106SI.pdf [file 0909267106_0909267106SI.pdf]

# Supporting Information

Sobotzik et al. 10.1073/pnas.0909267106

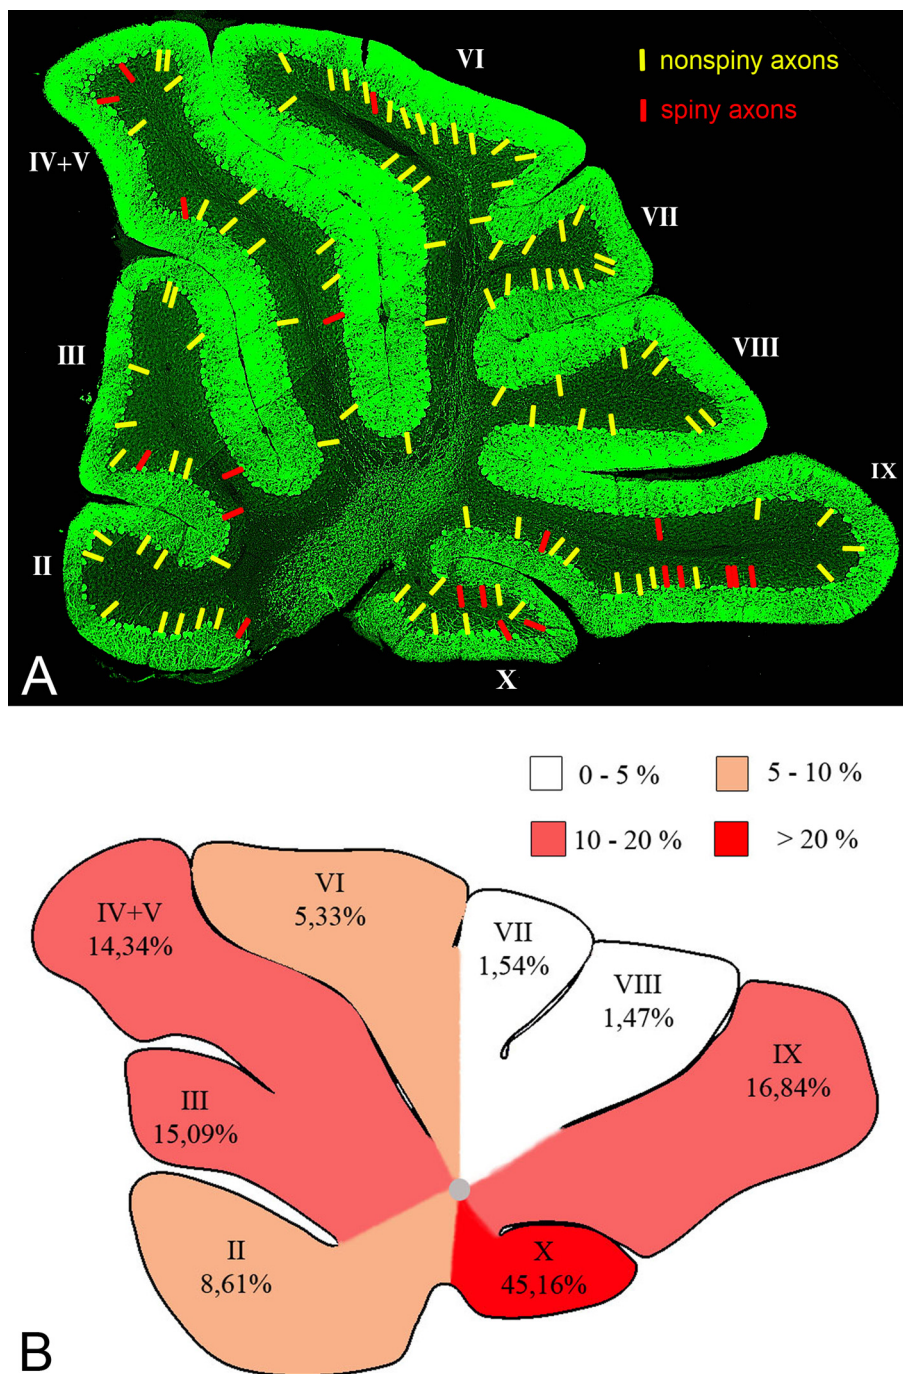

**Fig. S1.** Distribution and prevalence of spiny axons in *ankG*<sup>-/-</sup> mice. (A) Paravermal sagittal section of an *ankG*-deficient cerebellum. Red lines denote spiny axons, and yellow lines denote nonspiny axons. Only axons that could be traced from their parental PC soma for a distance of at least 50  $\mu\text{m}$  were included. (B) The average percentage of spiny axons was assessed in 3 *ankG*<sup>-/-</sup> mice. A total of 1,756 axons in 3 *ankG*<sup>-/-</sup> mice and 1,378 axons in 3 age-matched *ankG*<sup>+/+</sup> mice were analyzed. Note preferential clustering of spiny axons in lobule X where 45% of all examined axons (56 of 124) possessed spines.

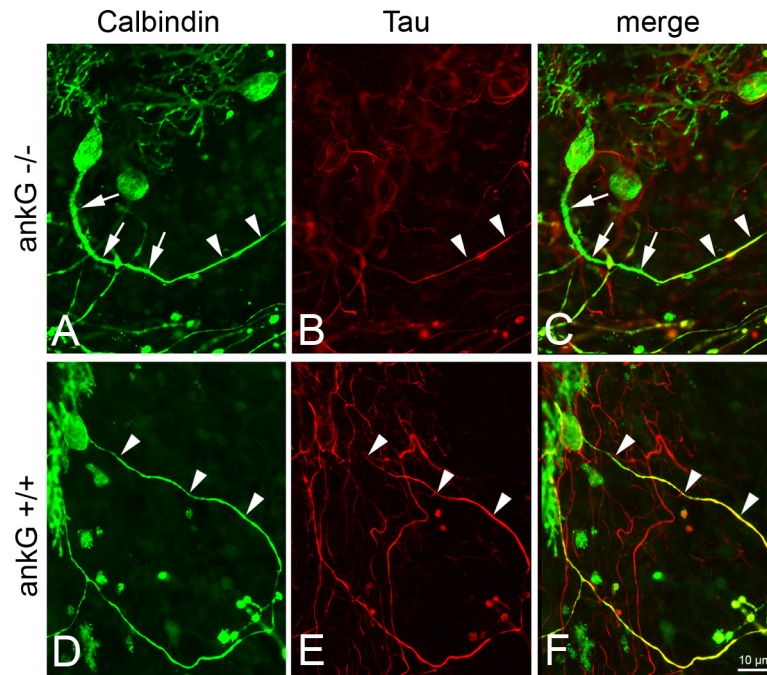

**Fig. S2.** Loss of tau protein in spiny segments of  $ankG^{-/-}$  PC axons (cerebellar slice cultures, DIV10). (A–C) The spiny segment of an  $ankG$ -deficient PC axon is denoted by arrows. Arrowheads point to the subsequent nonspiny segment of the same axon. As demonstrated in the merged picture in C, the spiny segment of this axon is virtually devoid of tau protein whereas normal tau accumulation is seen in the nonspiny segment of this process. (D–F) Normal enrichment of tau protein observed in a PC axon of a control animal (arrowheads.) (Scale bar, 10  $\mu$ m.)



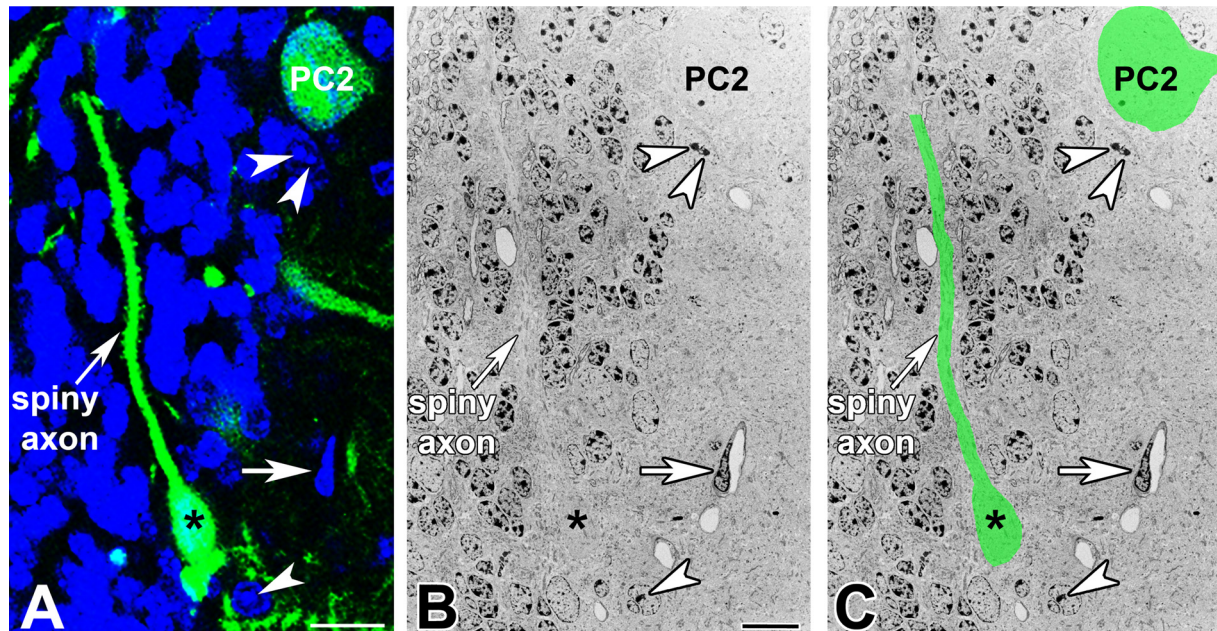

**Fig. S4.** Identification of an EGFP-positive spiny PC axon at the EM level. (A) Confocal image of EGFP-positive spiny axon and surrounding nuclei (labeled in blue by TO-PRO-3). A spiny axon can be traced from its corresponding PC soma (asterisk) into the deep granule cell layer. (B) At the EM level, the same spiny axon can be identified in ultrathin sections. Structures that can be matched between A and B include another PC soma (PC2), a nucleus of a vascular endothelial cell (arrow), and distinct nucleoli of Bergmann glia (arrowheads). The plane of the ultrathin section thus precisely corresponds to that recorded by confocal microscopy in A. (C) The contours of the correlated spiny axon and the second PC soma (PC2) are highlighted in green. The trajectory of the spiny axon exactly matches that shown in A. (Scale bars, 10  $\mu\text{m}$ .)

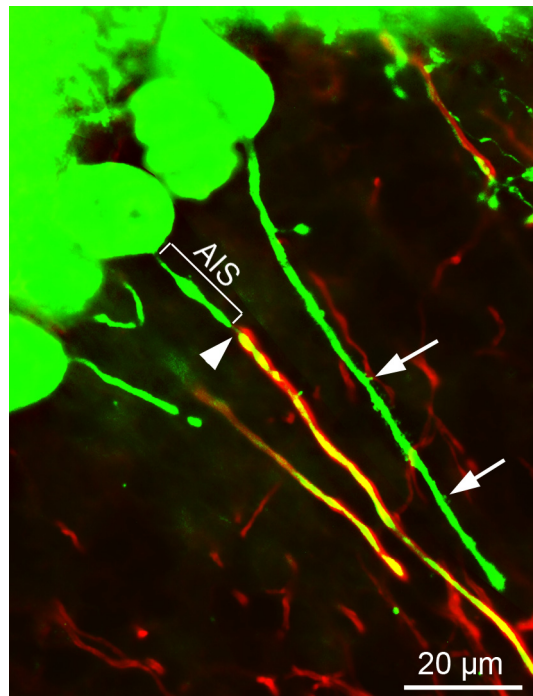

**Fig. 55.** Spiny axons of  $ankG^{-/-}$  PCs exhibit impaired myelination as revealed by double immunofluorescence for calbindin (green) and myelin basic protein (red). Arrows point to a spiny axon that lacks a myelin sheath. By comparison, a neighboring nonspiny axon (arrowhead) is endowed with a normal myelin sheath.

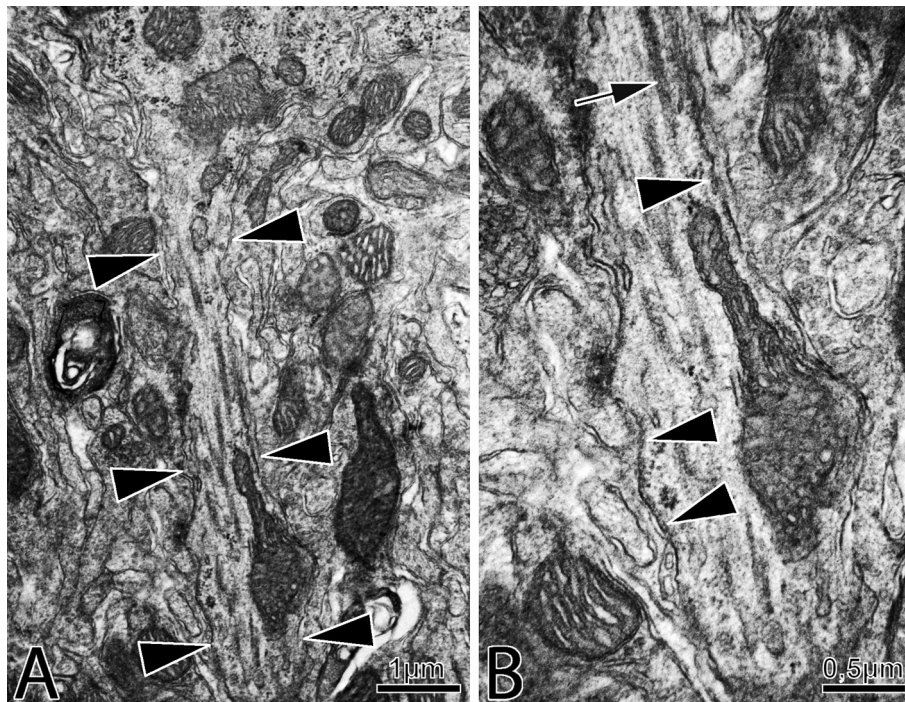

**Fig. S6.** Ultrastructural features of an AIS originating from a control PC. (A) The borders of the AIS are indicated by arrowheads. (B) Close-up view showing typical AIS features including the dense undercoating (arrowheads) and fasciculated microtubules (arrow).

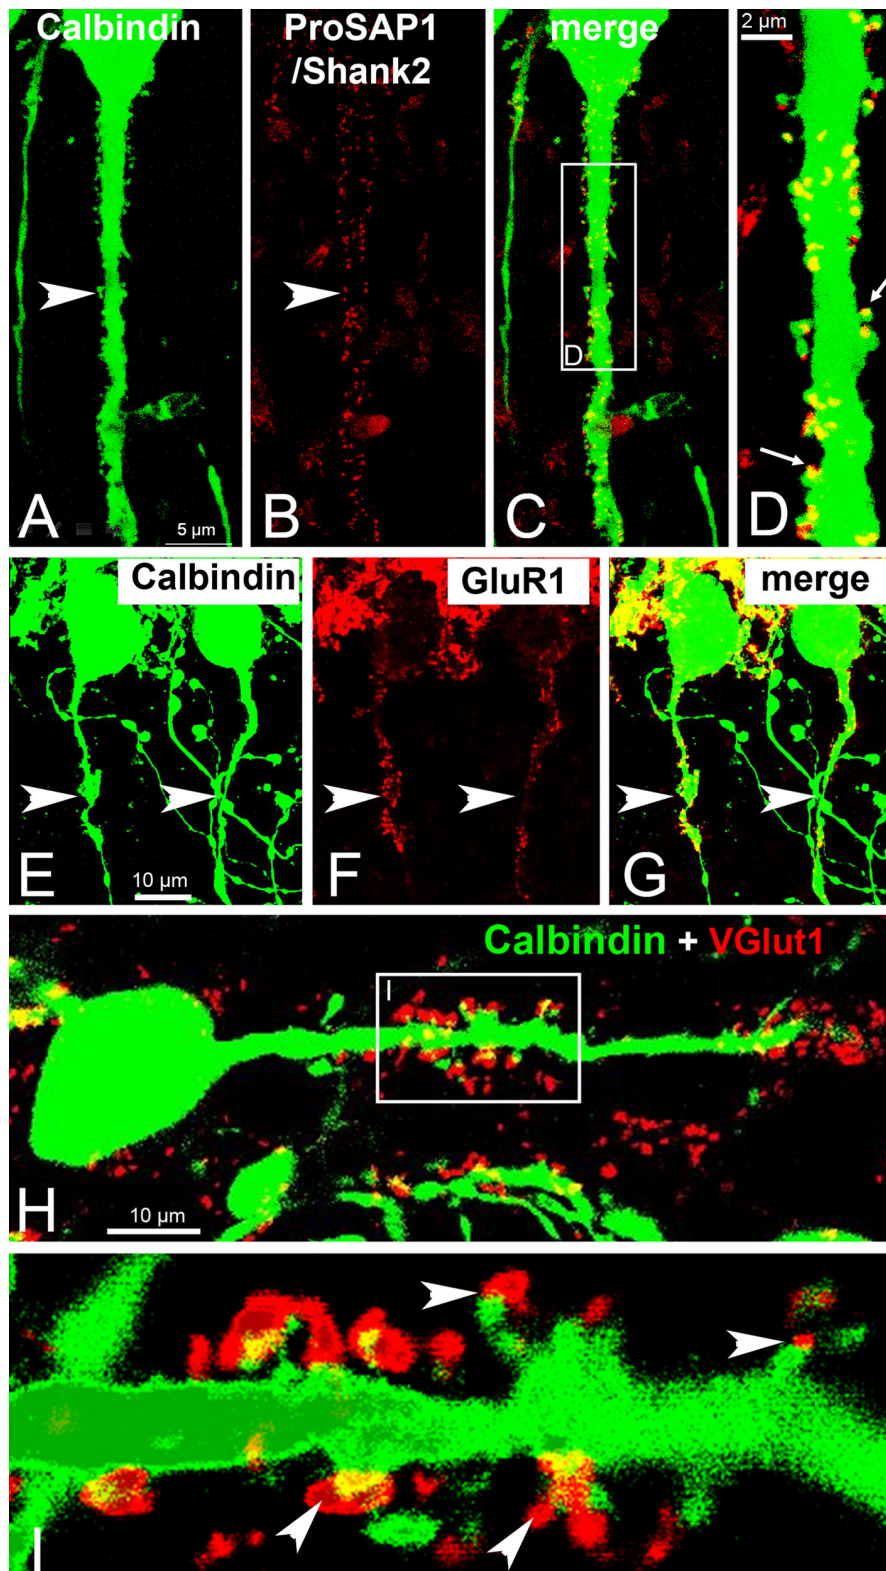

**Fig. S7.** EGFP-positive spiny PC axons in cerebellar slice cultures (DIV10) exhibit dendritic features. Cultures were prepared from L7-EGFP/ankG<sup>-/-</sup> mice at P9. (A–D) ProSAP1/Shank2 is targeted to an EGFP-positive spiny PC axon (arrowhead). (D) Close-up view of framed area in C. Arrows: accumulation of ProSap1/Shank2 in axonal spines. (E–G) EGFP-positive spiny axons are enriched with the ionotropic glutamate receptor GluR1 (arrowheads). (H and I) EGFP-positive axonal spines are contacted by VGlut1-positive boutons. A close-up view of the framed area in H is shown in I.
